# Supplementary material for: Nitrogen Influence to the Independent Invasion and the Co-Invasion of Solidago canadensis and Conyza canadensis via Intensified Allelopathy
Source: MDPI journal article supplement (doi:10.3390/su141911970), 2022-09-22
Supplement: s1 [file s1]

### Electronic supplementary materials:

**Table S1** The ecological significance, measuring method, and the corresponding references for the measured seed germination and seedling growth indicators of *L. sativa*.

| Measured indices           | Ecology significances       | Determination methods                                                                          | References                                                                                                                                                                                                                                                                                                                                                                                                                                                                                                                                                                                                                                   |
|----------------------------|-----------------------------|------------------------------------------------------------------------------------------------|----------------------------------------------------------------------------------------------------------------------------------------------------------------------------------------------------------------------------------------------------------------------------------------------------------------------------------------------------------------------------------------------------------------------------------------------------------------------------------------------------------------------------------------------------------------------------------------------------------------------------------------------|
| Germination percentage (%) | Germination competitiveness | The ratio of the number of the normal germinated seeds to the total number of the tested seeds | Wei M, Wang S, Wu BD, Cheng HY, Wang CY. 2020. Combined allelopathy of Canada goldenrod and horseweed on the seed germination and seedling growth performance of lettuce. Landscape and Ecological Engineering 16: 299–306.; Yu YL, Cheng HY, Xu ZL, Zhong SS, Wang CY, Guo EH. 2022. Invasion intensity modulates the allelopathic impact of <i>Solidago canadensis</i> L. leaves and roots against <i>Lactuca sativa</i> L. during germination and early seedling stage. International Journal of Environmental Research 16: 48.; Yu YL, Cheng HY, Wei M, Wang S, Wang CY. 2022. Silver nanoparticles intensify the allelopathic intensity |

of four invasive plant species in the Asteraceae. Anais da Academia Brasileira de Ciências 94: e20201661.

|                           |                   |                                                                                                                                                                                                                                                                                                                                                                                                                                                                                                                                                                                                                                                                                                                                                                                                                                                                                      |
|---------------------------|-------------------|--------------------------------------------------------------------------------------------------------------------------------------------------------------------------------------------------------------------------------------------------------------------------------------------------------------------------------------------------------------------------------------------------------------------------------------------------------------------------------------------------------------------------------------------------------------------------------------------------------------------------------------------------------------------------------------------------------------------------------------------------------------------------------------------------------------------------------------------------------------------------------------|
| Germination potential (%) | Germination power | <p>The ratio of the number of the normal germinated seeds to the total number of the tested seeds on the third day</p> <p>Wei M, Wang S, Wu BD, Cheng HY, Wang CY. 2020. Combined allelopathy of Canada goldenrod and horseweed on the seed germination and seedling growth performance of lettuce. Landscape and Ecological Engineering 16: 299–306.; Yu YL, Cheng HY, Xu ZL, Zhong SS, Wang CY, Guo EH. 2022. Invasion intensity modulates the allelopathic impact of <i>Solidago canadensis</i> L. leaves and roots against <i>Lactuca sativa</i> L. during germination and early seedling stage. International Journal of Environmental Research 16: 48.; Yu YL, Cheng HY, Wei M, Wang S, Wang CY. 2022. Silver nanoparticles intensify the allelopathic intensity of four invasive plant species in the Asteraceae. Anais da Academia Brasileira de Ciências 94: e20201661.</p> |
|---------------------------|-------------------|--------------------------------------------------------------------------------------------------------------------------------------------------------------------------------------------------------------------------------------------------------------------------------------------------------------------------------------------------------------------------------------------------------------------------------------------------------------------------------------------------------------------------------------------------------------------------------------------------------------------------------------------------------------------------------------------------------------------------------------------------------------------------------------------------------------------------------------------------------------------------------------|

|             |             |                                                                                                                                                 |
|-------------|-------------|-------------------------------------------------------------------------------------------------------------------------------------------------|
| Germination | Germination | <p>Germination index = <math>\sum G_i</math></p> <p>Schmer MR, Xue Q, Hendrickson JR. 2012. Salinity effects on perennial, warm-season (C4)</p> |
|-------------|-------------|-------------------------------------------------------------------------------------------------------------------------------------------------|

|             |             |                                                                                                                                                                                                                                                                                                                                                                                                                                                                                                                                                                                                                                                                                                                                                                                                                                                                                                                                                                                                                                                                                                                                               |
|-------------|-------------|-----------------------------------------------------------------------------------------------------------------------------------------------------------------------------------------------------------------------------------------------------------------------------------------------------------------------------------------------------------------------------------------------------------------------------------------------------------------------------------------------------------------------------------------------------------------------------------------------------------------------------------------------------------------------------------------------------------------------------------------------------------------------------------------------------------------------------------------------------------------------------------------------------------------------------------------------------------------------------------------------------------------------------------------------------------------------------------------------------------------------------------------------|
| index       | activity    | <p>/ <math>I</math>, where <math>G_i</math> means the grass germination adapted to the northern Great Plains. Canadian Journal of Plant Science 92: 873–881.; Hou QQ, Chen BM, Peng SL, Chen LY. 2014. Effects of extreme temperature on germinated seeds and <math>I</math> seedling establishment of nonnative invasive plants. Biological Invasions 16: 2049–2061.;</p> <p>means the time after cultivation (day)</p> <p>Fang ZG, Hu ZY, Zhao HH, Yang L, Ding CL, Lou LQ, Cai QS. 2017. Screening for cadmium tolerance of 21 cultivars from Italian ryegrass (<i>Lolium multiflorum</i> Lam) during germination. Grassland Science 63: 36–45.; Tan M, Liao F, Hou LT, Wang J, Wei LJ, Jian HJ, Xu XF, Li JN, Liu LZ. 2017. Genome-wide association analysis of seed germination percentage and germination index in <i>Brassica napus</i> L. under salt and drought stresses. Euphytica 213: 40.;</p> <p>Ding TL, Yang Z, Wei XC, Yuan F, Yin SS, Wang BS. 2018. Evaluation of salt-tolerant germplasm and screening of the salt-tolerance traits of sweet sorghum in the germination stage. Functional Plant Biology 45: 1073–1081.</p> |
| Germination | Germination | <p>The arithmetic product of Steinmaus SJ, Timonthy SP, Jodie SH. 2000. Estimation of base temperature for nine weed</p>                                                                                                                                                                                                                                                                                                                                                                                                                                                                                                                                                                                                                                                                                                                                                                                                                                                                                                                                                                                                                      |

|             |                         |                                                                                                                                                                                                                                                                                  |
|-------------|-------------------------|----------------------------------------------------------------------------------------------------------------------------------------------------------------------------------------------------------------------------------------------------------------------------------|
| rate index  | strength                | the two values of species. Journal of Experimental Botany 51: 275–286.; Qiu J, Bai YG, Fu YB, Wilmshurstc                                                                                                                                                                        |
|             | germination percentage  | JF. 2010. Spatial variation in temperature thresholds during seed germination of remnant                                                                                                                                                                                         |
|             | and germination index   | <i>Festuca hallii</i> populations across the Canadian prairie. Environmental and Experimental Botany 67: 479–486.; Mollard FPO, Naeth MA. 2014. Photoinhibition of germination in grass seed-Implications for prairie revegetation. Journal of Environmental Management 14: 1–9. |
| Germination | Germination             | The arithmetic product of                                                                                                                                                                                                                                                        |
| vigor index | vitality                | the two values of barnyardgrass ( <i>Echinochloa crus-galli</i> ). Allelopathy Journal 7: 215–224.; Li Z, Peng Y, Zhang                                                                                                                                                          |
|             | germination index and   | XQ, Ma X, Hang LK, Yan YH. 2014. Exogenous spermidine improves seed germination of                                                                                                                                                                                               |
|             | seedling biomass (fresh | white clover under water stress via involvement in starch metabolism, antioxidant defenses                                                                                                                                                                                       |
|             | weight)                 | and relevant gene expression. Molecules 19: 18003–18024.; Ding TL, Yang Z, Wei XC, Yuan                                                                                                                                                                                          |
|             |                         | F, Yin SS, Wang BS. 2018. Evaluation of salt-tolerant germplasm and screening of the                                                                                                                                                                                             |
|             |                         | salt-tolerance traits of sweet sorghum in the germination stage. Functional Plant Biology 45:                                                                                                                                                                                    |

1073–1081.

Promptness Germination Promptness index = Grzesiak S. 2001. Genotypic variation between maize (*Zea mays* L.) single cross hybrids in index rapid response (1.00) \*  $nd_2$  + (0.75) \* response to drought stress. *Acta Physiologiae Plantarum* 23: 443–456.; Noreen Z, Ashraf M, capability  $nd_4$  + (0.50) \*  $nd_6$  + Hassan MU. 2007. Inter-accessional variation for salt tolerance in pea (*Pisum sativum* L.) at (0.25) \*  $nd_8$ , where  $nd_2$ , germination and screening stage. *Pak. J. Bot.* 39: 2075–2085.; Asci OO. 2011. Salt tolerance  $nd_4$ ,  $nd_6$ , and  $nd_8$  are the in red clover (*Trifolium pratense* L.) seedlings. *African Journal of Biotechnology* 10: number of the normal 8774–8781.; Toscano S, Romano D, Tribulato A, Patane C. 2017. Effects of drought stress on germinated seeds in the seed germination of ornamental sunflowers. *Acta Physiologiae Plantarum* 39: 184. second, fourth, sixth, and eighth days after cultivation, respectively.

Seedling Competitiveness A ruler with 0.1 cm Wei M, Wang S, Wu BD, Cheng HY, Wang CY. 2020. Combined allelopathy of Canada

|             |                 |                     |                         |                                                                                          |                                                                                                        |                                                                                    |
|-------------|-----------------|---------------------|-------------------------|------------------------------------------------------------------------------------------|--------------------------------------------------------------------------------------------------------|------------------------------------------------------------------------------------|
| height (cm) | for             | sunlight            | accuracy                | (the                                                                                     | distance                                                                                               | goldenrod and horseweed on the seed germination and seedling growth performance of |
|             | acquisition     |                     |                         | between the base of the                                                                  | lettuce. Landscape and Ecological Engineering 16: 299–306.; Yu YL, Cheng HY, Xu ZL,                    |                                                                                    |
|             |                 |                     |                         | stem and the apical                                                                      | Zhong SS, Wang CY, Guo EH. 2022. Invasion intensity modulates the allelopathic impact of               |                                                                                    |
|             |                 |                     | shoot)                  |                                                                                          | <i>Solidago canadensis</i> L. leaves and roots against <i>Lactuca sativa</i> L. during germination and |                                                                                    |
|             |                 |                     |                         |                                                                                          | early seedling stage. International Journal of Environmental Research 16: 48.; Yu YL, Cheng            |                                                                                    |
|             |                 |                     |                         |                                                                                          | HY, Wei M, Wang S, Wang CY. 2022. Silver nanoparticles intensify the allelopathic intensity            |                                                                                    |
|             |                 |                     |                         |                                                                                          | of four invasive plant species in the Asteraceae. Anais da Academia Brasileira de Ciências 94:         |                                                                                    |
|             |                 |                     |                         |                                                                                          | e20201661.                                                                                             |                                                                                    |
| Radicle     | Competitiveness | A ruler with 0.1 cm |                         |                                                                                          | Wei M, Wang S, Wu BD, Cheng HY, Wang CY. 2020. Combined allelopathy of Canada                          |                                                                                    |
| length (cm) | for water and   | accuracy            | (the                    | distance                                                                                 | goldenrod and horseweed on the seed germination and seedling growth performance of                     |                                                                                    |
|             | inorganic salt  |                     | between the base of the | lettuce. Landscape and Ecological Engineering 16: 299–306.; Yu YL, Cheng HY, Xu ZL,      |                                                                                                        |                                                                                    |
|             | acquisition     |                     | radicle and the radicle | Zhong SS, Wang CY, Guo EH. 2022. Invasion intensity modulates the allelopathic impact of |                                                                                                        |                                                                                    |

tip) *Solidago canadensis* L. leaves and roots against *Lactuca sativa* L. during germination and early seedling stage. International Journal of Environmental Research 16: 48.; Yu YL, Cheng HY, Wei M, Wang S, Wang CY. 2022. Silver nanoparticles intensify the allelopathic intensity of four invasive plant species in the Asteraceae. Anais da Academia Brasileira de Ciências 94: e20201661.

|                                                         |                                                                                                                                   |                                                                                                                                                                                                                                                                                                                                                                                                                                                                                                                                                                                                                                                                                                                                                                                              |
|---------------------------------------------------------|-----------------------------------------------------------------------------------------------------------------------------------|----------------------------------------------------------------------------------------------------------------------------------------------------------------------------------------------------------------------------------------------------------------------------------------------------------------------------------------------------------------------------------------------------------------------------------------------------------------------------------------------------------------------------------------------------------------------------------------------------------------------------------------------------------------------------------------------------------------------------------------------------------------------------------------------|
| Leaf dimensions (i.e., leaf area length and width) (cm) | Leaf photosynthetic accuracy (the maximum value along the midrib and the maximum value perpendicular to the midrib, respectively) | <p>A ruler with 0.1 cm accuracy (the maximum value along the midrib and the maximum value perpendicular to the midrib, respectively)</p> <p>Wei M, Wang S, Wu BD, Cheng HY, Wang CY. 2020. Combined allelopathy of Canada goldenrod and horseweed on the seed germination and seedling growth performance of lettuce. Landscape and Ecological Engineering 16: 299–306.; Yu YL, Cheng HY, Xu ZL, Zhong SS, Wang CY, Guo EH. 2022. Invasion intensity modulates the allelopathic impact of <i>Solidago canadensis</i> L. leaves and roots against <i>Lactuca sativa</i> L. during germination and early seedling stage. International Journal of Environmental Research 16: 48.; Yu YL, Cheng HY, Wei M, Wang S, Wang CY. 2022. Silver nanoparticles intensify the allelopathic intensity</p> |
|---------------------------------------------------------|-----------------------------------------------------------------------------------------------------------------------------------|----------------------------------------------------------------------------------------------------------------------------------------------------------------------------------------------------------------------------------------------------------------------------------------------------------------------------------------------------------------------------------------------------------------------------------------------------------------------------------------------------------------------------------------------------------------------------------------------------------------------------------------------------------------------------------------------------------------------------------------------------------------------------------------------|

of four invasive plant species in the Asteraceae. *Anais da Academia Brasileira de Ciências* 94: e20201661.

|                                    |                          |                                                   |                                                                                                                                                                                                                                                                                                                                                                                                                                                                                                                                                                                                                                                                                                                                                                                                                                                                                                             |
|------------------------------------|--------------------------|---------------------------------------------------|-------------------------------------------------------------------------------------------------------------------------------------------------------------------------------------------------------------------------------------------------------------------------------------------------------------------------------------------------------------------------------------------------------------------------------------------------------------------------------------------------------------------------------------------------------------------------------------------------------------------------------------------------------------------------------------------------------------------------------------------------------------------------------------------------------------------------------------------------------------------------------------------------------------|
| Green leaf area (cm <sup>2</sup> ) | Leaf photosynthetic area | Green leaf area = leaf length × leaf width × 0.75 | Rybinski W, Garczynski S. 2004. Influence of laser light on leaf area and parameters of photosynthetic activity in DH lines of spring barley ( <i>Hordeum vulgare</i> L.). <i>International Agrophysics</i> 18: 261–267.; Amanullah, Marwat KB, Shah P, Maula N, Arifullah S. 2009. Nitrogen levels and its time of application influence leaf area, height and biomass of maize planted at low and high density. <i>Pakistan Journal of Botany</i> 41: 761–768.; Xia TT, Miao YX, Wu DL, Shao H, Khosla R, Mi GH. 2016. Active optical sensing of spring maize for in-season diagnosis of nitrogen status based on nitrogen nutrition index. <i>Remote Sensing</i> 8: 605.; Huang SS, Sun LQ, Hu X, Wang YH, Zhang YJ, Nevo E, Peng JH, Sun DF. 2018. Associations of canopy leaf traits with SNP markers in durum wheat ( <i>Triticum turgidum</i> L. <i>durum</i> (Desf.)). <i>PLoS One</i> 13: e206226. |
|------------------------------------|--------------------------|---------------------------------------------------|-------------------------------------------------------------------------------------------------------------------------------------------------------------------------------------------------------------------------------------------------------------------------------------------------------------------------------------------------------------------------------------------------------------------------------------------------------------------------------------------------------------------------------------------------------------------------------------------------------------------------------------------------------------------------------------------------------------------------------------------------------------------------------------------------------------------------------------------------------------------------------------------------------------|



|                                                      |                              |                                                                   |                                                                                                                                                                                                                                                                                                                                                                                                                                                                                                                                                                                                                                                                                                                                                        |
|------------------------------------------------------|------------------------------|-------------------------------------------------------------------|--------------------------------------------------------------------------------------------------------------------------------------------------------------------------------------------------------------------------------------------------------------------------------------------------------------------------------------------------------------------------------------------------------------------------------------------------------------------------------------------------------------------------------------------------------------------------------------------------------------------------------------------------------------------------------------------------------------------------------------------------------|
| Seedling biomass (including wet and dry weights) (g) | Plant growth competitiveness | An electronic balance with 0.001 g accuracy                       | Wei M, Wang S, Wu BD, Cheng HY, Wang CY. 2020. Combined allelopathy of Canada goldenrod and horseweed on the seed germination and seedling growth performance of lettuce. Landscape and Ecological Engineering 16: 299–306.; Yu YL, Cheng HY, Xu ZL, Zhong SS, Wang CY, Guo EH. 2022. Invasion intensity modulates the allelopathic impact of <i>Solidago canadensis</i> L. leaves and roots against <i>Lactuca sativa</i> L. during germination and early seedling stage. International Journal of Environmental Research 16: 48.; Yu YL, Cheng HY, Wei M, Wang S, Wang CY. 2022. Silver nanoparticles intensify the allelopathic intensity of four invasive plant species in the Asteraceae. Anais da Academia Brasileira de Ciências 94: e20201661. |
| Moisture content (%)                                 | Plant water content          | The ratio of the difference between fresh weight per seedling and | Wei M, Wang S, Wu BD, Cheng HY, Wang CY. 2020. Combined allelopathy of Canada goldenrod and horseweed on the seed germination and seedling growth performance of lettuce. Landscape and Ecological Engineering 16: 299–306.; Yu YL, Cheng HY, Xu ZL,                                                                                                                                                                                                                                                                                                                                                                                                                                                                                                   |

dry weight per seedling to fresh weight per seedling Zhong SS, Wang CY, Guo EH. 2022. Invasion intensity modulates the allelopathic impact of *Solidago canadensis* L. leaves and roots against *Lactuca sativa* L. during germination and early seedling stage. International Journal of Environmental Research 16: 48.; Yu YL, Cheng HY, Wei M, Wang S, Wang CY. 2022. Silver nanoparticles intensify the allelopathic intensity of four invasive plant species in the Asteraceae. Anais da Academia Brasileira de Ciências 94: e20201661.

Stress intensity index The stress intensity of different treatments on the plant seed germination and seedling condition with stress and Stress intensity index =  $1 - (X_s / X_{ns})$ , where  $X_s$  and  $X_{ns}$  mean the average performance Tern H, Singh SP. 2002. Comparison of sources and lines selected for drought resistance in common bean. Crop Science 42: 64–70.; Zangi MR. 2005. Correlation between drought resistance indices and cotton yield in stress and non stress conditions. Asian Journal of Plant Sciences 4: 106–108.; Anwar J, Subhani GM, Hussain M, Ahmad J, Hussain M, Munir M. 2011. Drought tolerance indices and their correlation with yield in exotic wheat genotypes. Pakistan Journal of Botany 43: 1527–1530.; Zdravković J, Jovanović Z, Đorđević M, Girek Z,

growth the condition without Zdravković M, Stikić R. 2013. Application of stress susceptibility index for drought tolerance stress, respectively. The screening of tomato populations. Genetika 45: 679–689.; Ballesta P, Mora F, Pozo AD. 2020. value of the index ranged Association mapping of drought tolerance indices in wheat: QTL-rich regions on chromosome from zero to one, and the 4A. Scientia Agricola, 77: e20180153.

index illustrates a stronger stress intensity if its value is close to one.

In contrast, the intensity of stress is weaker if its value is close to zero.

---

**Table S2** Two-way ANOVA showing the effect of the main factors: the form of nitrogen solution, and the type of aqueous leaf extracts, and their interactions on the indicators of lettuce. *P* values equal to or less than 0.05 are shown in bold.

|                                  |                         | Sum of Squares | df | Mean Square | <i>F</i> | <i>P</i>          | $\eta^2$ |
|----------------------------------|-------------------------|----------------|----|-------------|----------|-------------------|----------|
| The form of<br>nitrogen solution | Germination percentage  | 544.7738       | 4  | 136.1935    | 3.9254   | <b>0.0092</b>     | 0.2924   |
|                                  | Germination potential   | 3660.0716      | 4  | 915.0179    | 13.7264  | <b>&lt;0.0001</b> | 0.5910   |
|                                  | Germination index       | 636.3049       | 4  | 159.0762    | 14.1490  | <b>&lt;0.0001</b> | 0.5983   |
|                                  | Germination rate index  | 708.5998       | 4  | 177.1499    | 10.3259  | <b>&lt;0.0001</b> | 0.5208   |
|                                  | Germination vigor index | 34.3837        | 4  | 8.5959      | 30.4251  | <b>&lt;0.0001</b> | 0.7621   |
|                                  | Promptness index        | 757.3781       | 4  | 189.3445    | 9.3982   | <b>&lt;0.0001</b> | 0.4973   |
|                                  | Seedling height         | 2.4451         | 4  | 0.6113      | 51.1547  | <b>&lt;0.0001</b> | 0.8434   |
|                                  | Radicle length          | 1.1473         | 4  | 0.2868      | 5.7342   | <b>0.0010</b>     | 0.3764   |
|                                  | Leaf length             | 0.8020         | 4  | 0.2005      | 66.1180  | <b>&lt;0.0001</b> | 0.8744   |
|                                  | Leaf width              | 0.0786         | 4  | 0.0196      | 54.2922  | <b>&lt;0.0001</b> | 0.8511   |
|                                  | Green leaf area         | 0.1993         | 4  | 0.0498      | 80.3960  | <b>&lt;0.0001</b> | 0.8943   |

|                                   |                         |            |   |           |          |         |        |
|-----------------------------------|-------------------------|------------|---|-----------|----------|---------|--------|
|                                   | Seedling fresh weight   | 0.0195     | 4 | 0.0049    | 63.9673  | <0.0001 | 0.8707 |
|                                   | Seedling dry weight     | <0.0001    | 4 | <0.0001   | 5.9061   | 0.0008  | 0.3834 |
|                                   | Moisture content        | 48.7727    | 4 | 12.1932   | 24.0324  | <0.0001 | 0.7167 |
|                                   | Stress intensity index  | 0.0955     | 4 | 0.0239    | 12.6991  | <0.0001 | 0.5721 |
| The type of aqueous leaf extracts | Germination percentage  | 1632.1750  | 3 | 544.0583  | 15.6808  | <0.0001 | 0.5532 |
|                                   | Germination potential   | 17143.4577 | 3 | 5714.4859 | 85.7240  | <0.0001 | 0.8713 |
|                                   | Germination index       | 13635.7629 | 3 | 4545.2543 | 404.2777 | <0.0001 | 0.9696 |
|                                   | Germination rate index  | 14524.7126 | 3 | 4841.5709 | 282.2100 | <0.0001 | 0.9570 |
|                                   | Germination vigor index | 279.5527   | 3 | 93.1842   | 329.8228 | <0.0001 | 0.9630 |
|                                   | Promptness index        | 6131.7958  | 3 | 2043.9319 | 101.4513 | <0.0001 | 0.8890 |
|                                   | Seedling height         | 0.2981     | 3 | 0.0994    | 8.3165   | 0.0002  | 0.3963 |
|                                   | Radicle length          | 2.0856     | 3 | 0.6952    | 13.8982  | <0.0001 | 0.5232 |

|                   |                         |            |    |           |          |                   |        |
|-------------------|-------------------------|------------|----|-----------|----------|-------------------|--------|
|                   | Leaf length             | 0.0636     | 3  | 0.0212    | 6.9943   | <b>0.0007</b>     | 0.3557 |
|                   | Leaf width              | 0.0194     | 3  | 0.0065    | 17.8993  | <b>&lt;0.0001</b> | 0.5856 |
|                   | Green leaf area         | 0.0190     | 3  | 0.0063    | 10.2367  | <b>&lt;0.0001</b> | 0.4470 |
|                   | Seedling fresh weight   | 0.0029     | 3  | 0.0010    | 12.7614  | <b>&lt;0.0001</b> | 0.5019 |
|                   | Seedling dry weight     | <0.0001    | 3  | <0.0001   | 16.3138  | <b>&lt;0.0001</b> | 0.5629 |
|                   | Moisture content        | 5.4546     | 3  | 1.8182    | 3.5836   | <b>0.0224</b>     | 0.2205 |
|                   | Stress intensity index  | 1.0362     | 3  | 0.3454    | 183.6992 | <b>&lt;0.0001</b> | 0.9355 |
| The form of       | Germination percentage  | 2114.1456  | 11 | 192.1951  | 5.5394   | <b>&lt;0.0001</b> | 0.6159 |
| nitrogen solution | Germination potential   | 18291.0603 | 11 | 1662.8237 | 24.9443  | <b>&lt;0.0001</b> | 0.8784 |
| * The type of     | Germination index       | 2430.4021  | 11 | 220.9456  | 19.6520  | <b>&lt;0.0001</b> | 0.8505 |
| aqueous leaf      | Germination rate index  | 3142.3002  | 11 | 285.6637  | 16.6510  | <b>&lt;0.0001</b> | 0.8282 |
| extracts          | Germination vigor index | 75.3497    | 11 | 6.8500    | 24.2453  | <b>&lt;0.0001</b> | 0.8753 |

|                        |           |    |          |         |                   |        |
|------------------------|-----------|----|----------|---------|-------------------|--------|
| Promptness index       | 2789.4125 | 11 | 253.5830 | 12.5867 | <b>&lt;0.0001</b> | 0.7846 |
| Seedling height        | 1.7108    | 11 | 0.1555   | 13.0154 | <b>&lt;0.0001</b> | 0.7903 |
| Radicle length         | 6.0620    | 11 | 0.5511   | 11.0173 | <b>&lt;0.0001</b> | 0.7613 |
| Leaf length            | 0.5080    | 11 | 0.0462   | 15.2282 | <b>&lt;0.0001</b> | 0.8151 |
| Leaf width             | 0.0683    | 11 | 0.0062   | 17.1624 | <b>&lt;0.0001</b> | 0.8324 |
| Green leaf area        | 0.1348    | 11 | 0.0123   | 19.7741 | <b>&lt;0.0001</b> | 0.8513 |
| Seedling fresh weight  | 0.0137    | 11 | 0.0012   | 16.2923 | <b>&lt;0.0001</b> | 0.8251 |
| Seedling dry weight    | <0.0001   | 11 | <0.0001  | 1.1242  | 0.3703            | 0.2455 |
| Moisture content       | 52.8682   | 11 | 4.8062   | 9.4729  | <b>&lt;0.0001</b> | 0.7328 |
| Stress intensity index | 0.5147    | 11 | 0.0468   | 24.8844 | <b>&lt;0.0001</b> | 0.8781 |



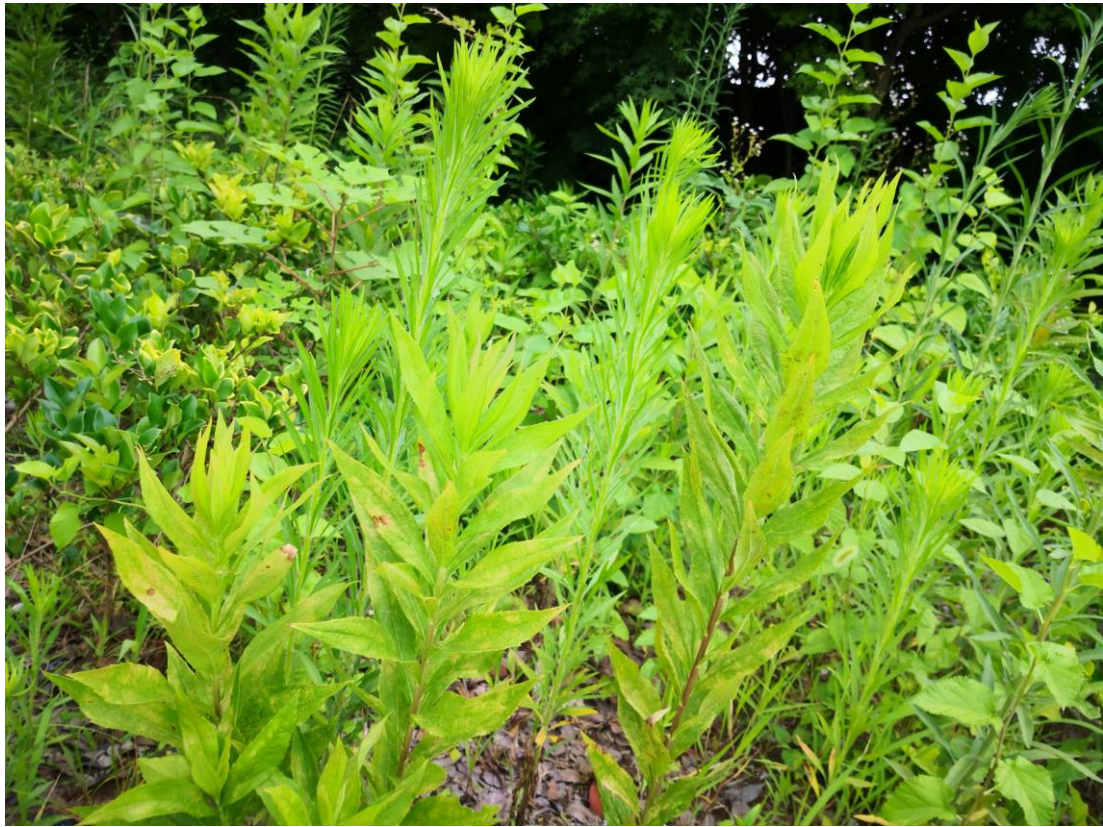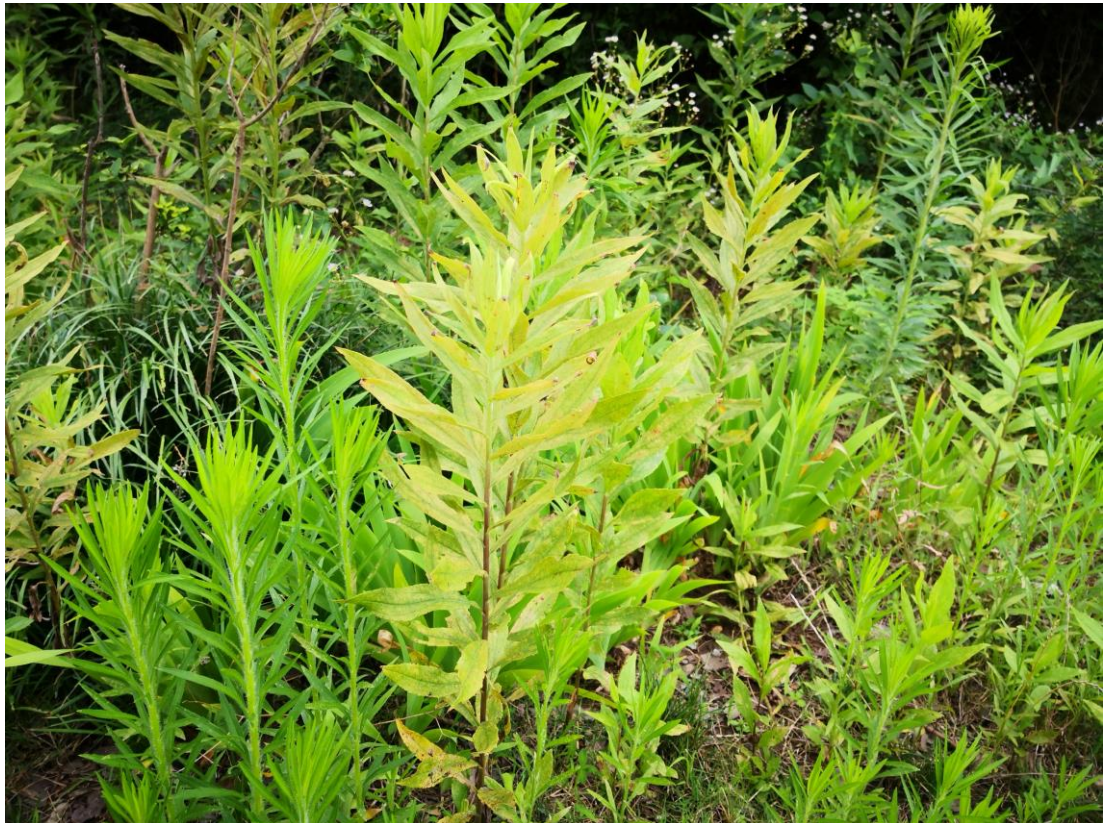



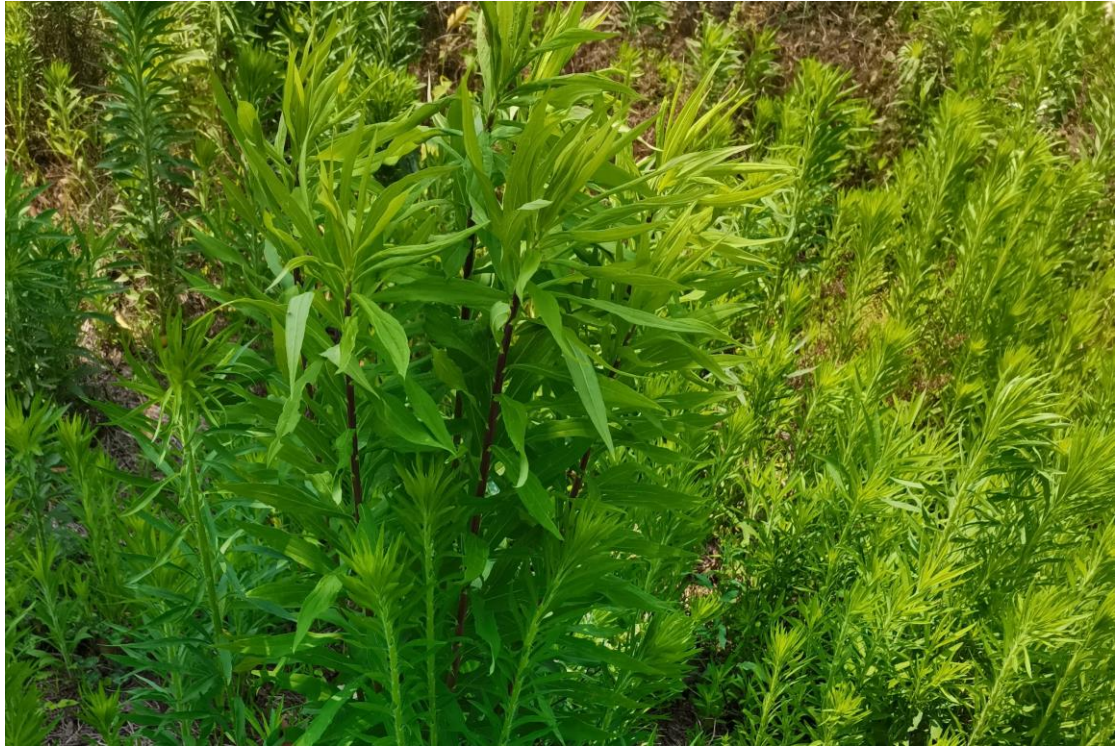

**Figure S1** The co-invasion of *Conyza canadensis* (L.) Cronq. and *Solidago canadensis* L. in the same habitat (by Congyan Wang).
